# Supplementary figures and images for: Synthesis, structure and magnetism of a new dicubane-like ferromagnetic tetranuclear nickel cluster containing versatile azido-only bridges and a bis(bidentate) Schiff base blocker
Source: Royal Society of Chemistry journal article supplement (doi:10.1039/b205375f), 2002-01-01

Plot of the reduced magnetisation ( $M/Nb$ ) vs  $H$  for 1 at 2 K. The value of 8 indicates a ground state of  $S = 4$ .

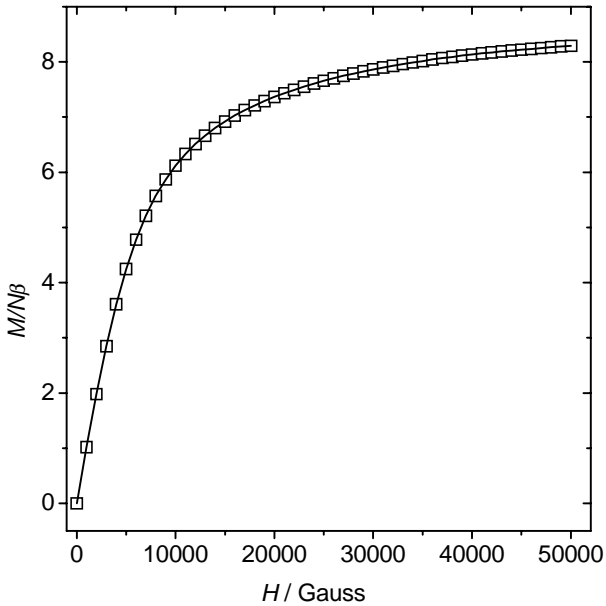

Supplement: b205375f.pdf [file b205375f.pdf]
